# Supplementary material for: Assessing Recovery of People With Serious Mental Illness: Development of a New Scale
Source: Atypon-hosted journal article supplement (doi:10.1176/appi.ps.201100109), 2012-01-01
Supplement: pss6301_48_ds.pdf [file pss6301_48_ds.pdf]

Appendix A. XXX Assessment of Recovery Scale

This scale contains a list of statements about your attitudes and beliefs about your health and wellness. There are no right or wrong answers; we just want to know what you think about these things. Read each statement and then decide how much you agree with it, from **Not at All** to **Very Much**. Then circle the number that best reflects how much you agree with each statement using the following scale:

**Not at All**  
1

**A Little Bit**  
2

**Somewhat**  
3

**Quite a Bit**  
4

**Very Much**  
5

**How much do you agree with the statement?**

**Not at All    A Little Bit    Somewhat    Quite a Bit    Very Much**

|                                                                   |   |   |   |   |   |
|-------------------------------------------------------------------|---|---|---|---|---|
| 1. I can influence important issues in my life.                   | 1 | 2 | 3 | 4 | 5 |
| 2. I have abilities that can help me reach my goals               | 1 | 2 | 3 | 4 | 5 |
| 3. I believe that getting better is possible.                     | 1 | 2 | 3 | 4 | 5 |
| 4. When I have a relapse, I am sure that I can get back on track. | 1 | 2 | 3 | 4 | 5 |
| 5. I have skills that help me to be successful.                   | 1 | 2 | 3 | 4 | 5 |
| 6. My strengths are more important than my weaknesses.            | 1 | 2 | 3 | 4 | 5 |
| 7. Overcoming challenges helps me to learn and grow.              | 1 | 2 | 3 | 4 | 5 |
| 8. I can have a fulfilling and satisfying life.                   | 1 | 2 | 3 | 4 | 5 |
| 9. It is up to me to set my own goals.                            | 1 | 2 | 3 | 4 | 5 |
| 10. I believe I make good choices in my life.                     | 1 | 2 | 3 | 4 | 5 |
